# Supplementary material for: Complex I inhibition augments dichloroacetate cytotoxicity through enhancing oxidative stress in VM-M3 glioblastoma cells
Source: PubMed Central journal article supplement (PMC5482478; doi:10.1371/journal.pone.0180061), 2017-06-23

**Fig 1A**

**p-PDH-E1 $\alpha$**

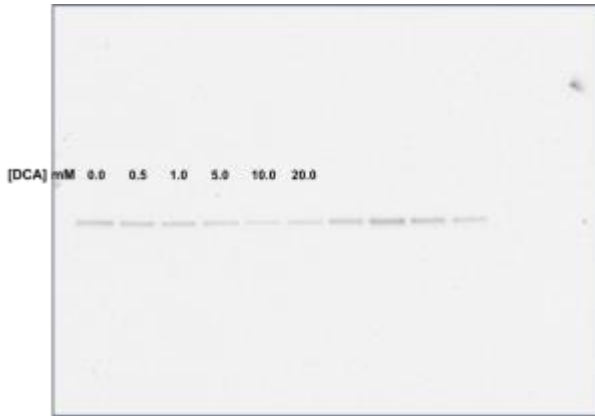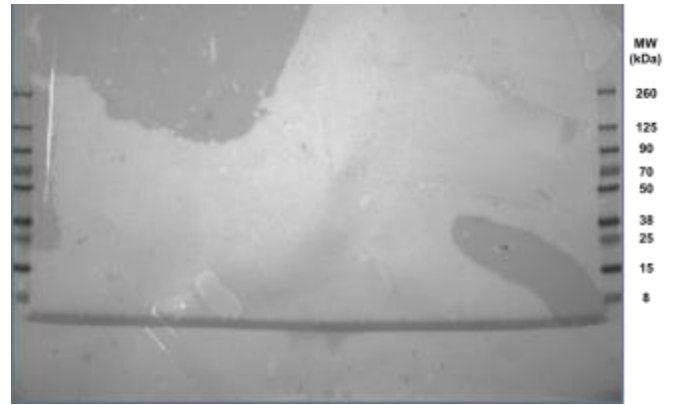

**PDH- E1 $\alpha$**

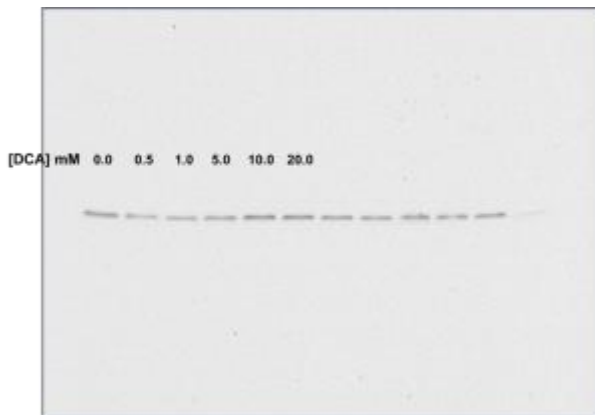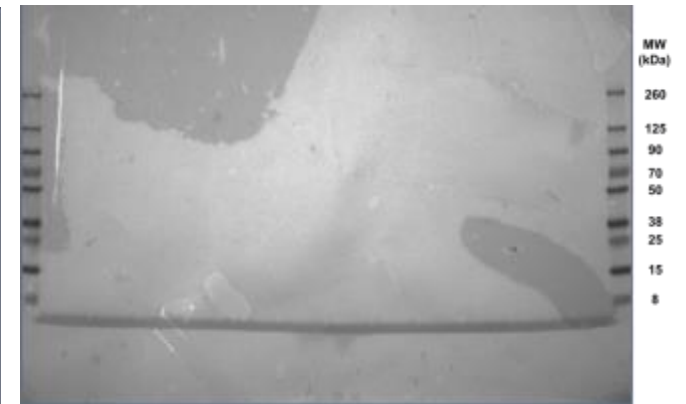

**Fig 3A**

**p-PDH-E1 $\alpha$**

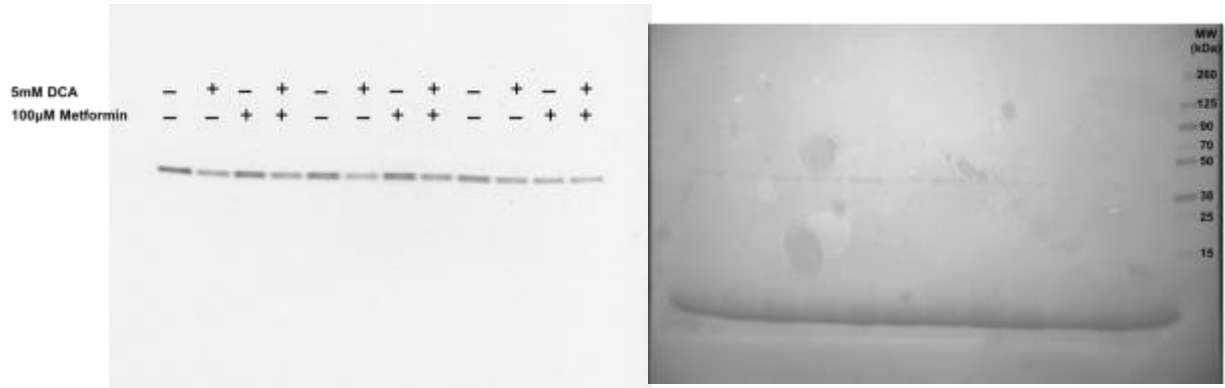

**PDH-E1 $\alpha$**

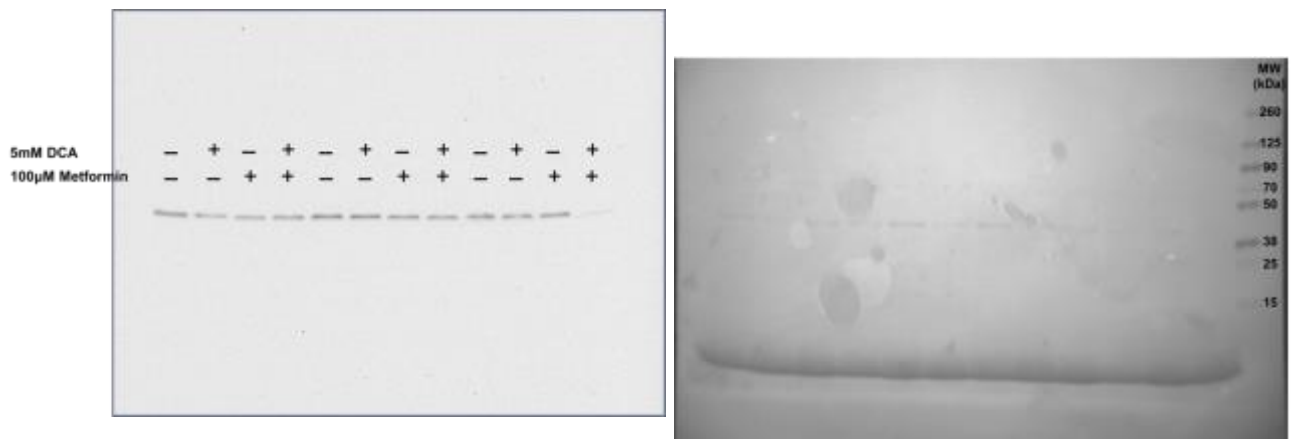

**S1 Fig A**

**PBS**

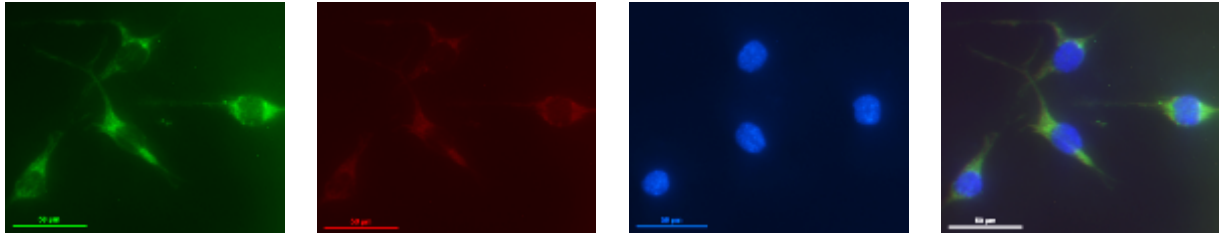

**5mM DCA**

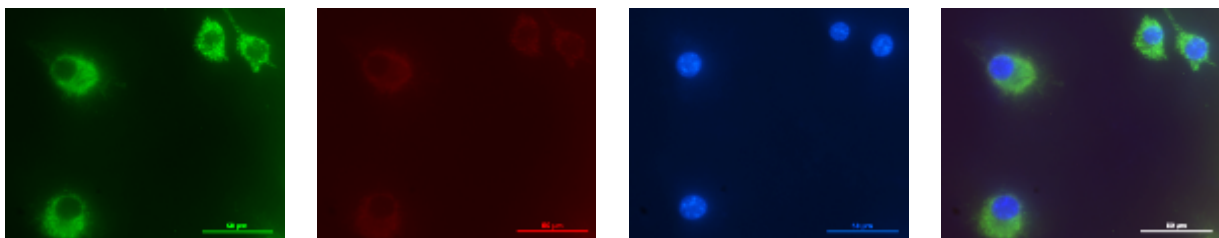

**5mM DCA + 0.5mM NAC**

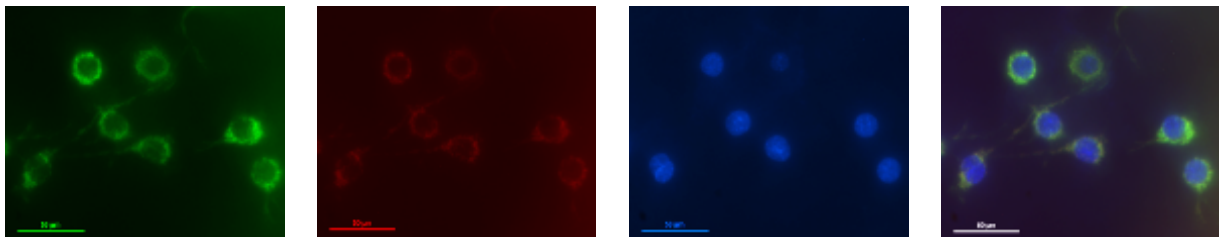

**20mM DCA**

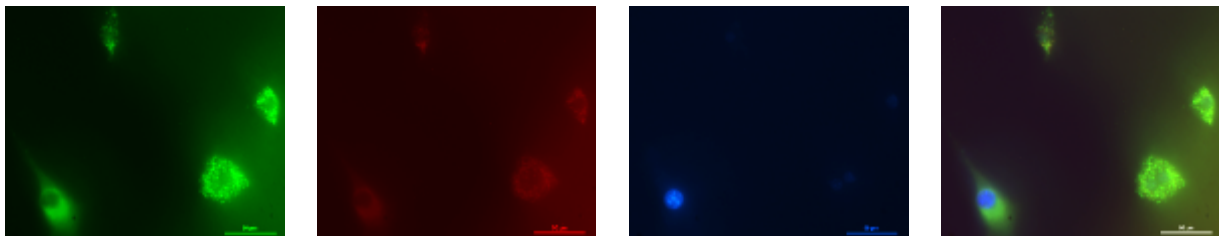

**20mM DCA + 0.5mM NAC**

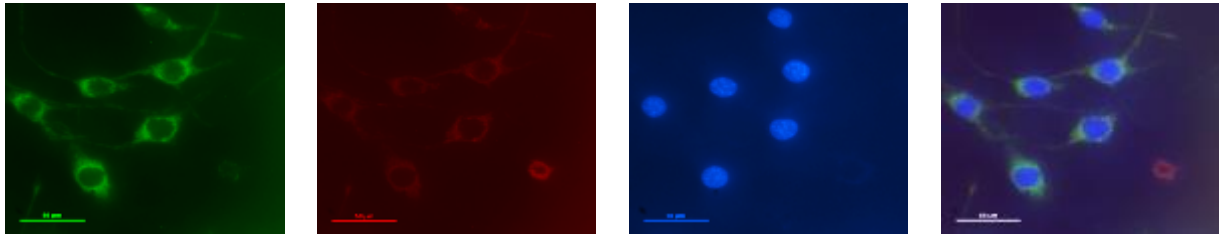

**S2 Fig C**

**PBS**

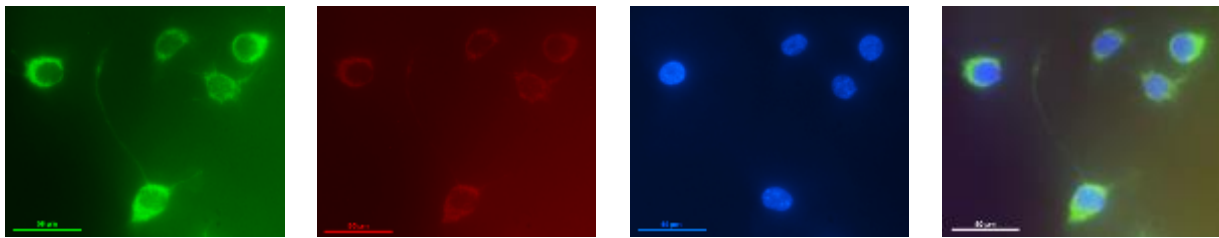

**5mM DCA**

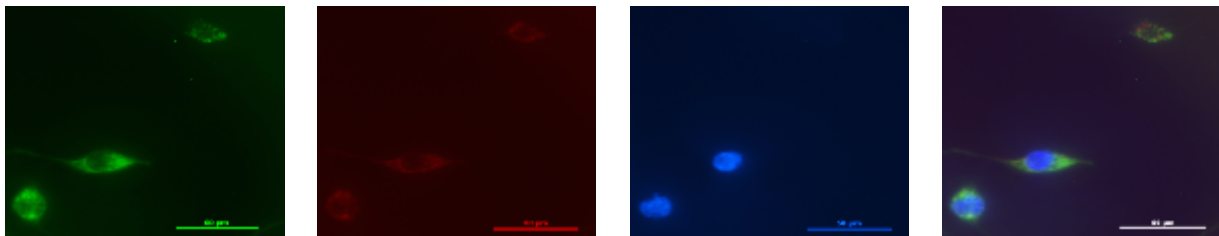

**100μM Metformin**

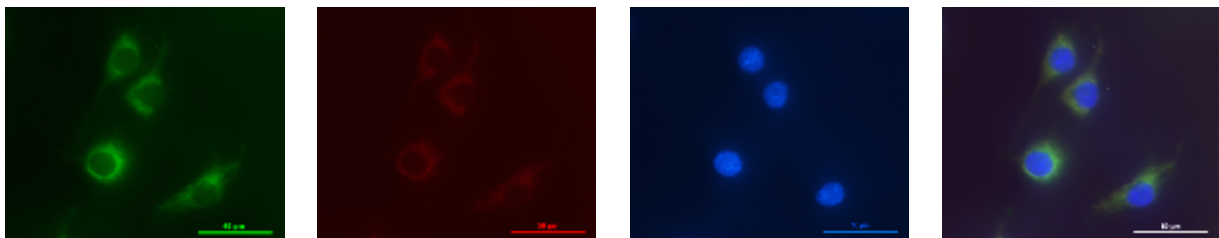

5mM DCA + 100µM Metformin

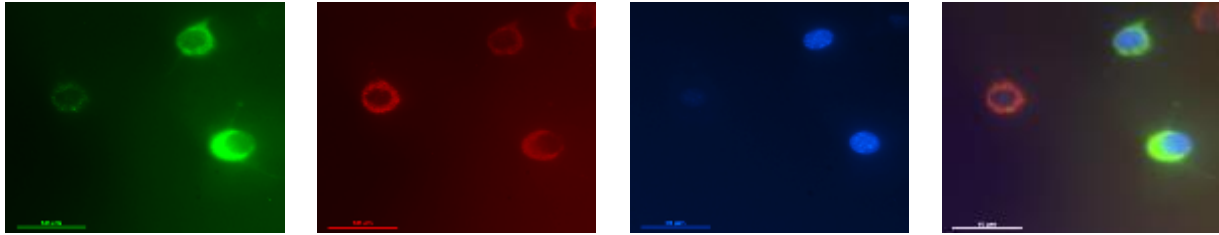

S3 Fig B

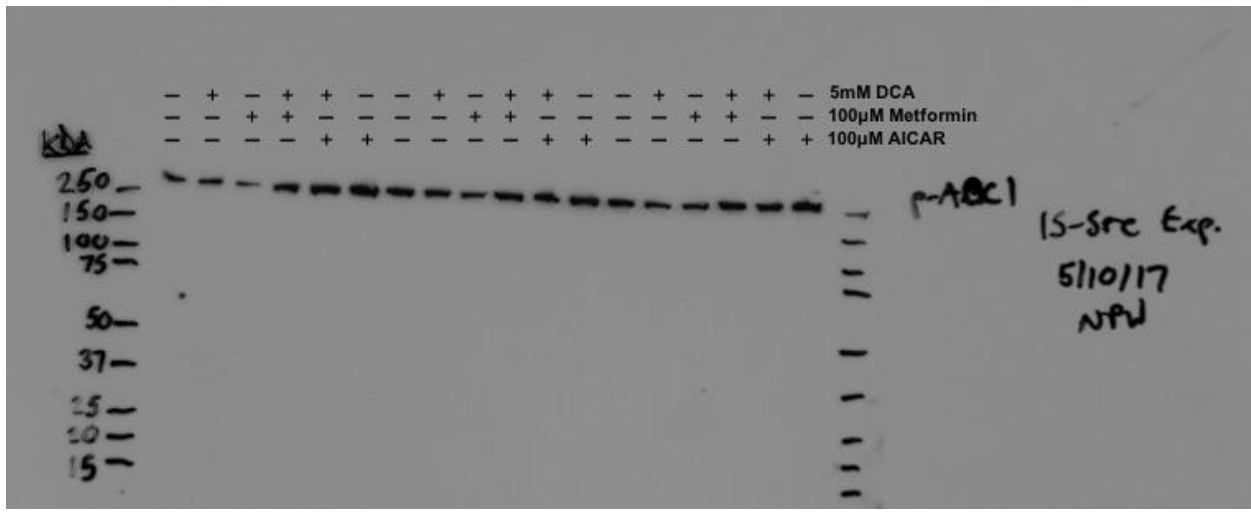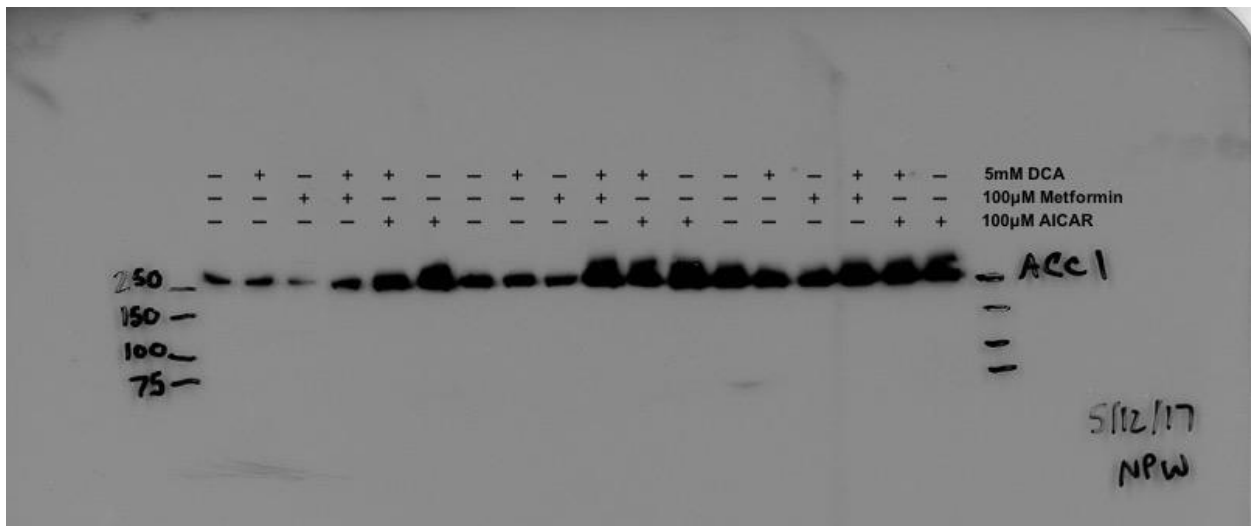

**S3 Fig C**

**PBS**

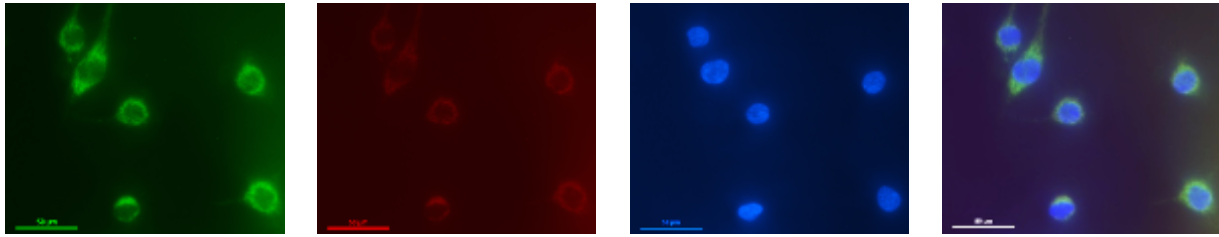

**5mM DCA**

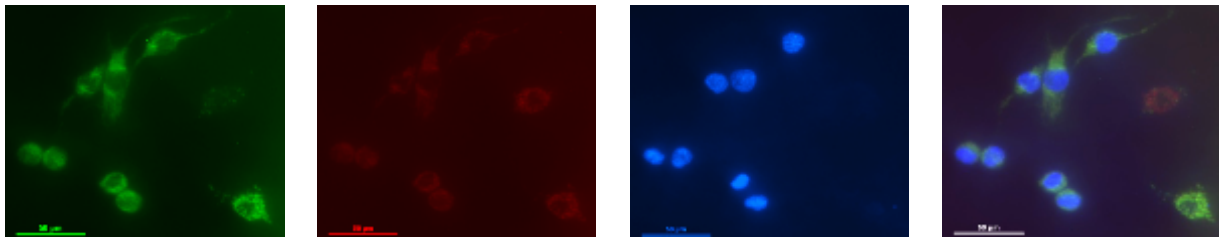

**100μM AICAR**

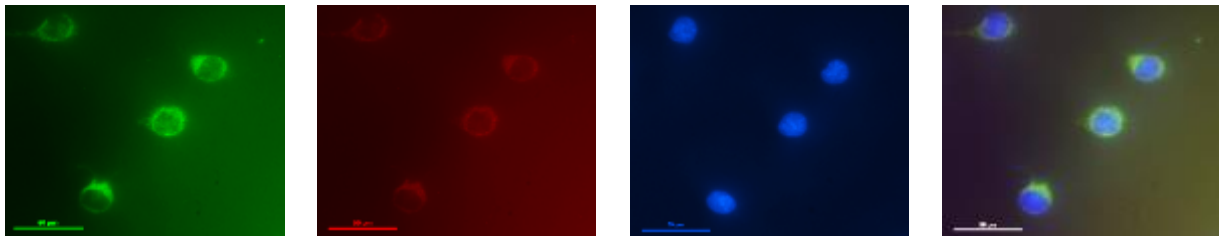

**5mM DCA + 100μM AICAR**

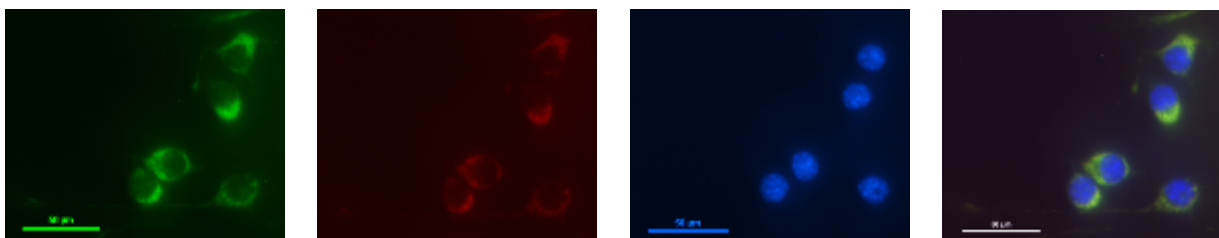

Supplement: pone.0180061.s004.pdf [file pone.0180061.s004.pdf]
